# Supplementary material for: Predictive Value of the Sequential Organ Failure Assessment Score for Mortality in a Contemporary Cardiac Intensive Care Unit Population
Source: PubMed Central journal article supplement — J Am Heart Assoc. 2018 Mar 10;7(6):e008169. doi: 10.1161/JAHA.117.008169 (PMC5907568; doi:10.1161/jaha.117.008169), 2018-03-10
Supplement: JAH3-7-e008169-s001.pdf [file JAH3-7-e008169-s001.pdf]

# **SUPPLEMENTAL MATERIAL**

**Table S1. Calculating the SOFA score and individual organ sub-scores.**

| <b>Organ system</b>                                                                                          | <b>Score 0</b> | <b>Score 1</b>                  | <b>Score 2</b>                      | <b>Score 3</b>                                                       | <b>Score 4</b>                                                  |
|--------------------------------------------------------------------------------------------------------------|----------------|---------------------------------|-------------------------------------|----------------------------------------------------------------------|-----------------------------------------------------------------|
| <b>Cardiovascular:</b><br>Mean arterial pressure (MAP, mmHg) and vasopressors (mcg/kg/min for $\geq 1$ hour) | MAP $\geq 70$  | MAP $< 70$ without vasopressors | Dopamine $\leq 5$ or any dobutamine | Dopamine $> 5$ , epinephrine $\leq 0.1$ or norepinephrine $\leq 0.1$ | Dopamine $> 15$ , epinephrine $> 0.1$ or norepinephrine $> 0.1$ |
| <b>Central nervous system:</b><br>Glasgow Coma Scale (GCS)                                                   | 15             | 13-14                           | 10-12                               | 6-9                                                                  | $< 6$                                                           |
| <b>Coagulation:</b><br>Platelet count $\times 10^3/\text{mm}^3$                                              | $> 150$        | $\leq 150$                      | $\leq 100$                          | $\leq 50$                                                            | $\leq 20$                                                       |
| <b>Liver:</b><br>Serum bilirubin (mg/dl)                                                                     | $< 1.2$        | 1.2-1.9                         | 2.0-5.9                             | 6.0-11.9                                                             | $\geq 12$                                                       |
| <b>Renal:</b><br>Serum creatinine (mg/dl) and urine output (UOP, ml/day)                                     | $< 1.2$        | 1.2-1.9                         | 2.0-3.4                             | 3.5-4.9 or UOP $< 500$                                               | $\geq 5$ or UOP $< 200$                                         |
| <b>Respiratory:</b><br>Arterial PaO <sub>2</sub> :FiO <sub>2</sub> (PF) ratio                                | $> 400$        | $\leq 400$                      | $\leq 300$                          | $\leq 200$                                                           | $\leq 100$                                                      |

Worst values for each of the 6 organ sub-scores are added for a given day to calculate the total SOFA score for that day. Data derived from Vincent JL, et al. *Intensive Care Med.* 1996;22:707-10.

**Figure S1. Observed versus predicted hospital mortality based on probabilities produced by a logistically transformed Day 1 SOFA score.**

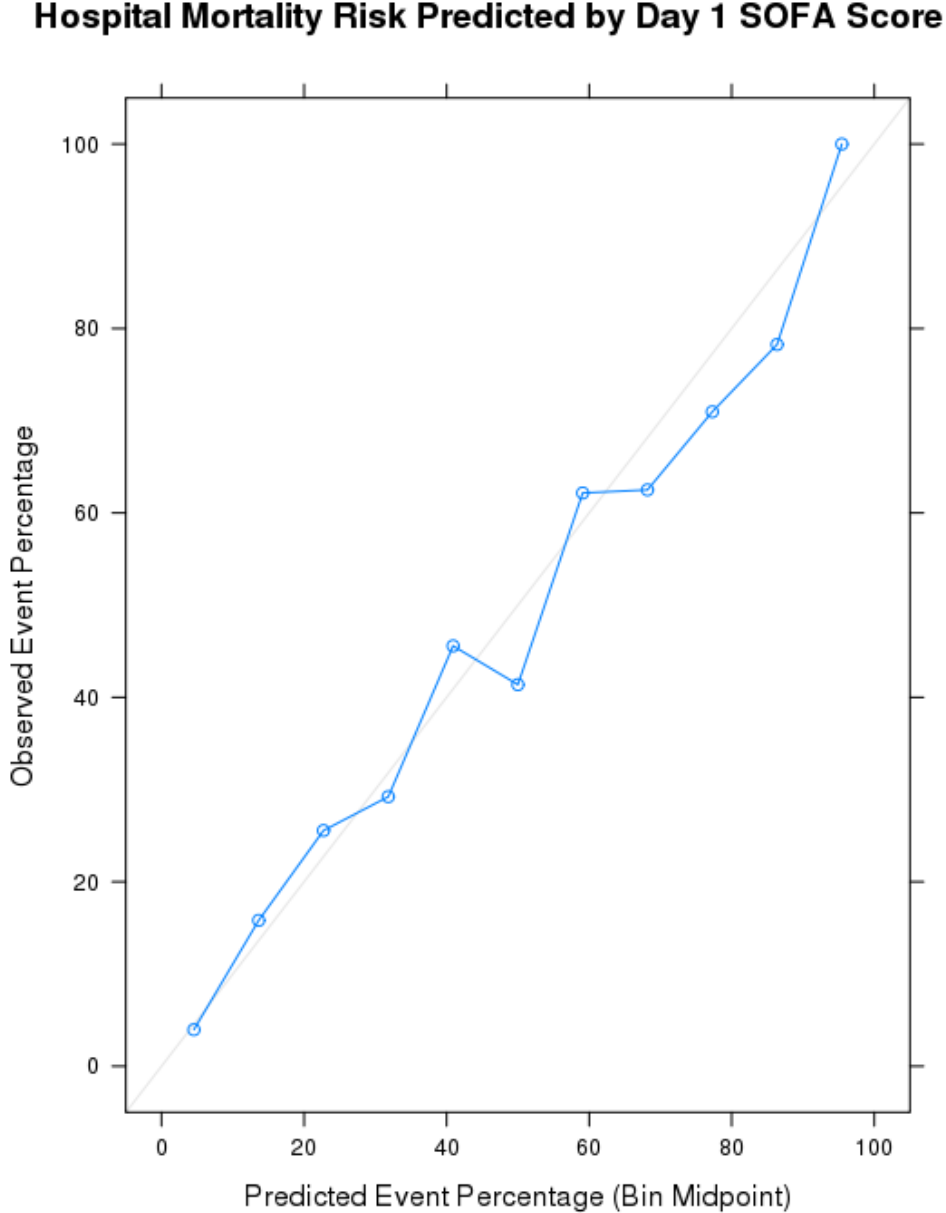

Based on the Hosmer-Lemeshow statistic, calibration of the Day 1 SOFA score was suboptimal ( $p < 0.05$ ) for hospital mortality. SOFA, Sequential Organ Failure Assessment.
